# Supplementary material for: An Internet-Based Cognitive Behavioral Therapy Program Adapted to Patients With Cardiovascular Disease and Depression: Randomized Controlled Trial
Source: JMIR Ment Health. 2019 Oct 3;6(10):e14648. doi: 10.2196/14648 (PMC7020777; doi:10.2196/14648)
Supplement: Multimedia Appendix 3 [file mental_v6i9e14648_app3.pdf]

## Multimedia Appendix 3

### Supplementary results to

[The effect of an internet-based cognitive behavioural therapy programme adapted to patients with cardiovascular disease and depression – a randomised controlled study]

Johansson, P., Westas, M., Andersson, G., Alehagen, U.,  
Broström, A., Jaarsma, T., Mourad, G., Lundgren, J.

## Results based on mixed model analysis using multiple imputed data.

The final mixed model analysis on multiple imputed data showed a significant effect of iCBT compared to ODF on PHQ-9 ( $P=.002$ ), MADRS-S ( $P <.001.$ ), EQ-VAS ( $P <.001.$ ) and MCS ( $P <.001.$ ) There was no significant difference between iCBT and ODF with regard to PCS ( $P=.26$ ). Effect sizes calculated on multiple imputed data indicate moderate effects of iCBT on depression and HRQoL, (Table A1).

**Table A1: Treatment effects**

All data is imputed using multiple imputation. Data are mean (SD) unless otherwise stated. SD is pooled in

accordance with the following equation:  $S_{pooled} = \sqrt{\frac{(n_1-1)s_1^2 + (n_2-1)s_2^2 + \dots + (n_k-1)s_k^2}{n_1 + n_2 + \dots + n_k - k}}$

|         | iCBT (n=72)   |               | ODF (n=72)    |               | Estimate for iCBT and time interaction, 95% CI |                | P      | Effect size (d) |
|---------|---------------|---------------|---------------|---------------|------------------------------------------------|----------------|--------|-----------------|
|         | Baseline      | 9 weeks       | Baseline      | 9 weeks       |                                                |                |        |                 |
| PHQ-9   | 10.71 (4.47)  | 6.39 (4.71)   | 10.22 (5.19)  | 8.30 (4.65)   | -2.40                                          | -3.93 to -0.87 | .002   | 0.51            |
| MADRS-S | 18.01 (7.25)  | 10.57 (7.51)  | 17.67 (6.31)  | 15.60 (8.26)  | -5.38                                          | -7.84 to -2.92 | <.001. | 0.71            |
| EQ-VAS  | 53.56 (20.09) | 65.34 (21.84) | 57.36 (18.47) | 56.27 (22.72) | 12.86                                          | 6.29 to 19.44  | <.001. | 0.64            |
| PCS12   | 39.80 (10.09) | 42.05 (10.63) | 37.79 (11.22) | 38.32 (11.71) | 1.72                                           | -1.28 to 4.72  | .26    | 0.19            |
| MCS12   | 36.08 (9.36)  | 43.62 (11.37) | 36.41 (10.00) | 38.18 (11.00) | 5.77                                           | 2.39 to 9.16   | <.001. | 0.56            |

PHQ-9= Patient Health Questionnaire 9. MADRS-S= Montgomery Åsberg Depression Rating Scale (self-rating version). EQ-VAS = EuroQol Visual Analogue Scale. PCS12= Physical Component Score of the Short Form 12. MCS12= Mental Component Score of the Short Form 12.

## Per protocol analyses

The per-protocol analysis was divided into two parts. In the first analysis all participants in the iCBT group that had completed at least one module in iCBT (n=64) was compared to those who had performed at least one activity in the ODF (n=46) (Table A2). This analysis showed a significant effect of iCBT on depression (PHQ-9 mean between group difference - 2.72 ( $P<.001.$ ) with a moderate effect size ( $d=0.69$ ). Depression as measured by MADRS-S showed a significant ( $P<.001.$ ) and large effect size (0.87). HRQoL as measured by EQ-VAS

and MCS showed a significant difference favouring iCBT ( $P<.001.$ ) and,  $P<.001.$ ) For the PCS no significant difference was found ( $p=.39$ ).

**Table A2: Treatment effect per-protocol**

Observed data on participants with at least one iCBT module or ODF activity. Data are mean (SD) unless otherwise stated.

|         | iCBT (n=64)   |               | ODF (n=46)    |               | Mean between-group treatment difference (95% CI) |                | <i>P</i> | Effect size (d) |
|---------|---------------|---------------|---------------|---------------|--------------------------------------------------|----------------|----------|-----------------|
|         | Baseline      | 9 weeks       | Baseline      | 9 weeks       |                                                  |                |          |                 |
| PHQ-9   | 10.74 (4.56)  | 6.30 (4.79)   | 10.14 (5.11)  | 8.63 (4.53)   | -2.72                                            | -4.24 to -1.20 | <.001.   | 0.69            |
| MADRS-S | 18.19 (6.96)  | 10.30 (7.42)  | 17.86 (5.76)  | 16.21 (8.34)  | -5.95                                            | -8.56 to -3.34 | <.001.   | 0.87            |
| EQ-VAS  | 53.12 (20.22) | 66.14 (21.69) | 58.73 (17.87) | 58.46 (21.92) | 11.56                                            | 4.88 to 18.25  | <.001.   | 0.66            |
| PCS12   | 39.79 (10.16) | 42.38 (10.74) | 39.98 (10.32) | 41.26 (11.06) | 1.31                                             | -1.76 to 4.38  | .39      | 0.16            |
| MCS12   | 35.80 (9.33)  | 43.94 (11.41) | 36.45 (10.49) | 36.81 (10.75) | 7.17                                             | 3.70 to 10.63  | <.001.   | 0.79            |

PHQ-9= Patient Health Questionnaire 9. MADRS-S= Montgomery Åsberg Depression Rating Scale (self-rating version). EQ-VAS = EuroQol Visual Analogue Scale. PCS= Physical Component Score of the Short Form 12. MCS= Mental Component Score of the Short Form 12.

In the second per-protocol analysis those participants in the iCBT group that had completed the full programme (i.e. seven modules,  $n=43$ ) were compared to those in the ODF ( $n=20$ ) who had performed at least nine activities ( $n=20$ ) (Table A3). This analysis revealed a significant effect of iCBT on depression (PHQ-9 mean between group difference -3.56 ( $P=.002$ ) with a large effect size ( $d=0.89$ ). Depression as measured by MADRS-S showed a significant ( $P=.002$ ) and large effect size (.90). HRQoL as measured by EQ-VAS and MCS showed a significant difference favouring iCBT ( $P<.001.$  and)  $P<.001.$  As for the PCS no significant difference was found ( $P=.26$ ).

**Table A3. Treatment effect per-protocol**

Observed data on participants with seven iCBT modules or at least nine ODF activities. Data are mean (SD) unless otherwise stated.

|         | iCBT (n=43)   |               | ODF (n=20)    |               | Mean between-group treatment difference (95% CI) |                 | <i>P</i> | Effect size (d) |
|---------|---------------|---------------|---------------|---------------|--------------------------------------------------|-----------------|----------|-----------------|
|         | Baseline      | 9 weeks       | Baseline      | 9 weeks       |                                                  |                 |          |                 |
| PHQ-9   | 10.86 (4.87)  | 6.09 (5.11)   | 11.15 (6.07)  | 9.80 (4.00)   | -3.56                                            | -5.74 to -1.37  | .002     | 0.89            |
| MADRS-S | 18.12 (7.16)  | 9.88 (7.95)   | 20.00 (6.77)  | 17.35 (8.67)  | -6.29                                            | -10.08 to -2.50 | .002     | 0.90            |
| EQ-VAS  | 50.35 (20.19) | 66.12 (22.80) | 55.90 (16.89) | 52.15 (22.27) | 18.19                                            | 8.67 to 27.71   | <.001.   | 1.03            |
| PCS12   | 38.21 (8.79)  | 41.96 (11.04) | 39.93 (11.07) | 40.73 (12.44) | 2.62                                             | -2.01 to 7.25   | .26      | 0.31            |
| MCS12   | 35.90 (9.83)  | 44.93 (12.28) | 34.34 (10.06) | 34.10 (8.54)  | 9.80                                             | 4.78 to 14.83   | <.001.   | 1.06            |

PHQ-9= Patient Health Questionnaire 9. MADRS-S= Montgomery Åsberg Depression Rating Scale (self-rating version). EQ-VAS = EuroQol Visual Analogue Scale. PCS12= Physical Component Score of the Short Form 12. MCS12= Mental Component Score of the Short Form 12.
